# Supplementary material for: Improving the thermoelectric power factor of CNT/PEDOT:PSS nanocomposite films by ethylene glycol treatment
Source: Royal Society of Chemistry journal article supplement (doi:10.1039/c6ra08599g), 2016-01-01
Supplement: c6ra08599g1.pdf [file c6ra08599g1.pdf]

## **Electronics Supplementary Information (ESI)**

---

### **Improving the thermoelectric power factor of CNT/PEDOT:PSS nanocomposite films by ethylene glycol treatment**

Woohwa Lee,<sup>ab</sup> Young Hun Kang,<sup>a</sup> Jun Young Lee,<sup>b</sup> Kwang-Suk Jang<sup>\*c</sup> and Song Yun Cho<sup>\*a</sup>

*<sup>a</sup>Division of Advanced Materials, Korea Research Institute of Chemical Technology, Daejeon 34114, Republic of Korea. E-mail: scho@kRICT.re.kr*

*<sup>b</sup>School of Chemical Engineering, Sungkyunkwan University, Suwon 16419, Republic of Korea*

*<sup>c</sup>Department of Chemical Engineering and Center of Chemical Technology, Hankyong National University, Anseong 17579, Republic of Korea. E-mail: jang@hknu.ac.kr*

*\*E-mail: scho@kRICT.re.kr (S.Y.C.); jang@hknu.ac.kr (K.-S.J.).*

---

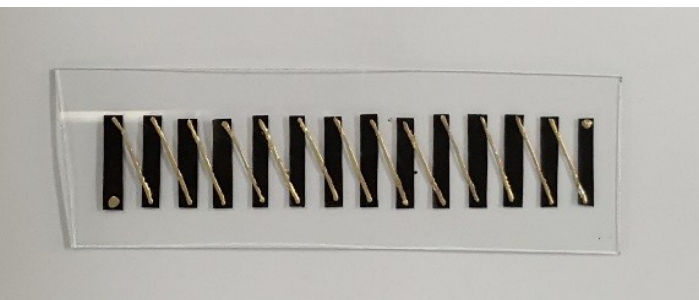

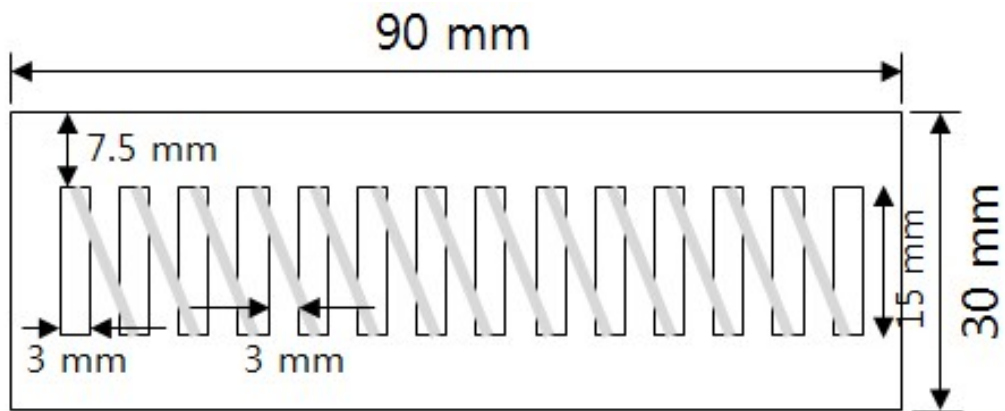

**Fig. S1** Photograph and schematic of the CNT/PEDOT:PSS OTEG.
